# Supplementary material for: Structural determinants of the dominant conformational epitopes of phospholipase A2 receptor in primary membranous nephropathy
Source: PubMed Central journal article supplement — J Biol Chem. 2022 Jan 19;298(3):101605. doi: 10.1016/j.jbc.2022.101605 (PMC8867125; doi:10.1016/j.jbc.2022.101605), 2022-01-19
Supplement: mmc3.pdf [file mmc3.pdf]

Figure S1

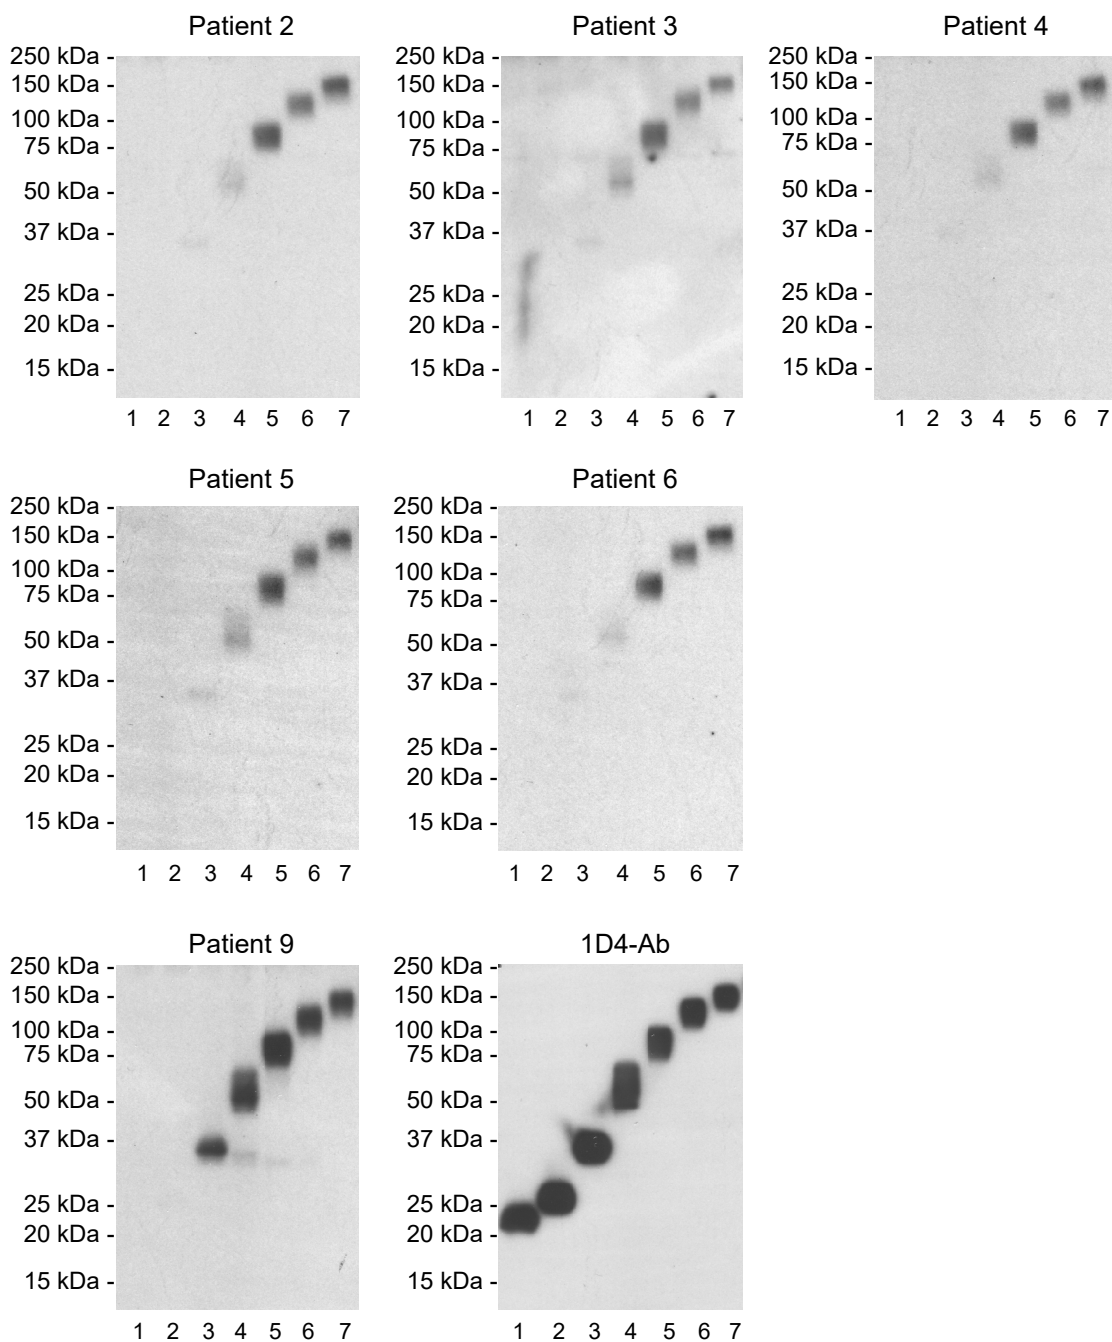

PLA2R extracellular domain fragments were resolved by 4-20% SDS-PAGE under nonreducing conditions and transferred to nitrocellulose membranes. The membranes were individually probed by each patient serum at 1:5000 dilutions in TBSTM buffer. Patient 9 serum was used as a positive control. The amount of protein in each sample was verified by the 1D4-Ab. The films were exposed for 5-8 minutes for the positive bands. The film for 1D4-Ab probing was exposed for 0.5 minute. 1, CysR; 2, CysR-FnII; 3, CysR-CTLD1; 4, CysR-CTLD2; 5, CysR-CTLD3; 6, CysR-CTLD4; 7, CysR-CTLD5.
