# Supplementary material for: Structural determinants of the dominant conformational epitopes of phospholipase A2 receptor in primary membranous nephropathy
Source: PubMed Central journal article supplement — J Biol Chem. 2022 Jan 19;298(3):101605. doi: 10.1016/j.jbc.2022.101605 (PMC8867125; doi:10.1016/j.jbc.2022.101605), 2022-01-19
Supplement: mmc4.pdf [file mmc4.pdf]

Figure S2

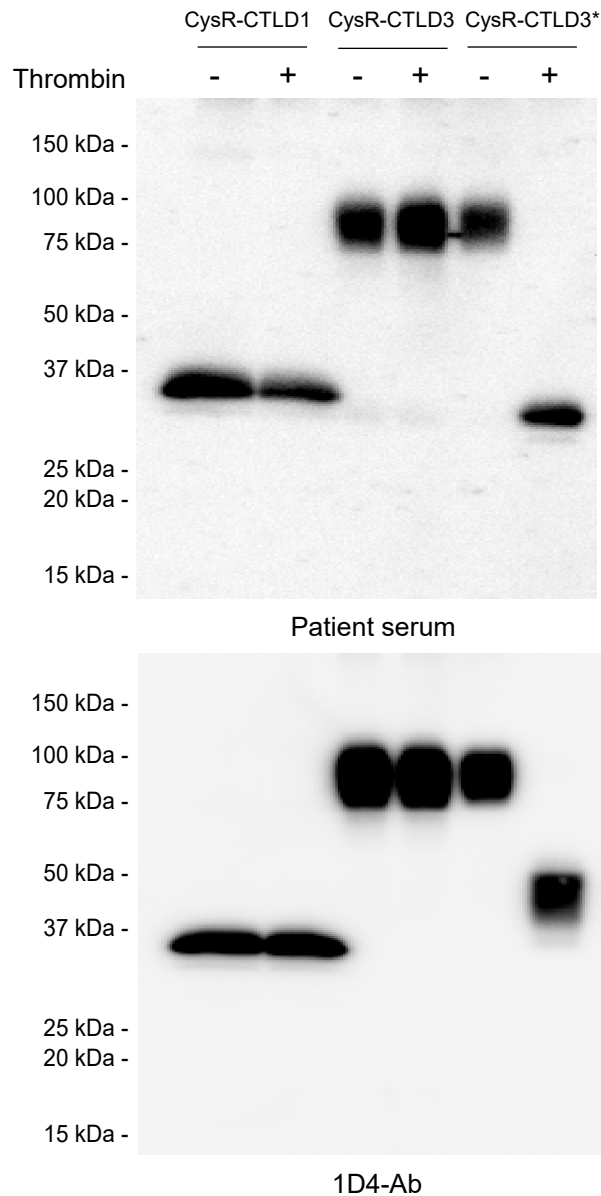

The 1D4 tagged PLA2R extracellular domain fragments, CysR-CTLD1 and CysR-CTLD3 without or with thrombin treatment were resolved by 4-20% SDS-PAGE under nonreducing conditions and transferred to a nitrocellulose membrane. The CysR-CTLD3\* fragment was included to serve as a positive control for thrombin cleavage. The membrane was probed by a PLA2R-Ab<sub>2</sub> dominant serum at 1:5000 dilutions in TBSTM buffer, and the amount of protein in each sample was verified by the 1D4-Ab. The experiment was performed 3 times. CysR-CTLD3\*, CysR-CTLD3 fragment with an introduced thrombin cleavage site between CTLD1 and CTLD3; 1D4-Ab, mouse anti-1D4 monoclonal antibody.
